# Supplementary material
Source: PubMed Central journal article supplement (PMC5109296)
Supplement: id6b00025_si_001.pdf [file id6b00025_si_001.pdf]

## SUPPORTING INFORMATION

### ***Plasmodium falciparum* Cyclic Amine Resistance Locus, PfCARL: a Resistance Mechanism for Two Distinct Compound Classes**

**Pamela A. Magistrado<sup>1φ</sup> and Victoria C. Corey<sup>2φ</sup>, Amanda K. Lukens<sup>1,3</sup>, Greg LaMonte<sup>2</sup>, Erika Sasaki<sup>2</sup>, Stephan Meister<sup>2</sup>, Melanie Wree<sup>2</sup>, Elizabeth Winzeler<sup>2</sup> and Dyann F. Wirth<sup>1,3,\*</sup>**

<sup>1</sup> Department of Immunology and Infectious Diseases, Harvard T.H. Chan School of Public Health, USA

<sup>2</sup> School of Medicine, University of California San Diego, USA

<sup>3</sup> Infectious Disease Program, The Broad Institute, 415 Main Street, Cambridge, MA 02142

<sup>φ</sup>These authors contributed equally

|                                                         |    |
|---------------------------------------------------------|----|
| <b>Figure S1</b> .....                                  | S2 |
| <b>Figure S2</b> .....                                  | S3 |
| <b>Figure S3</b> .....                                  | S4 |
| <b>Table S1</b> ( <i>see attached excel file</i> )..... | S4 |
| <b>Table S2</b> .....                                   | S4 |
| <b>Table S3</b> ( <i>see attached excel file</i> )..... | S5 |
| <b>Table S4</b> .....                                   | S5 |

*Total Page Count: S1-S5*

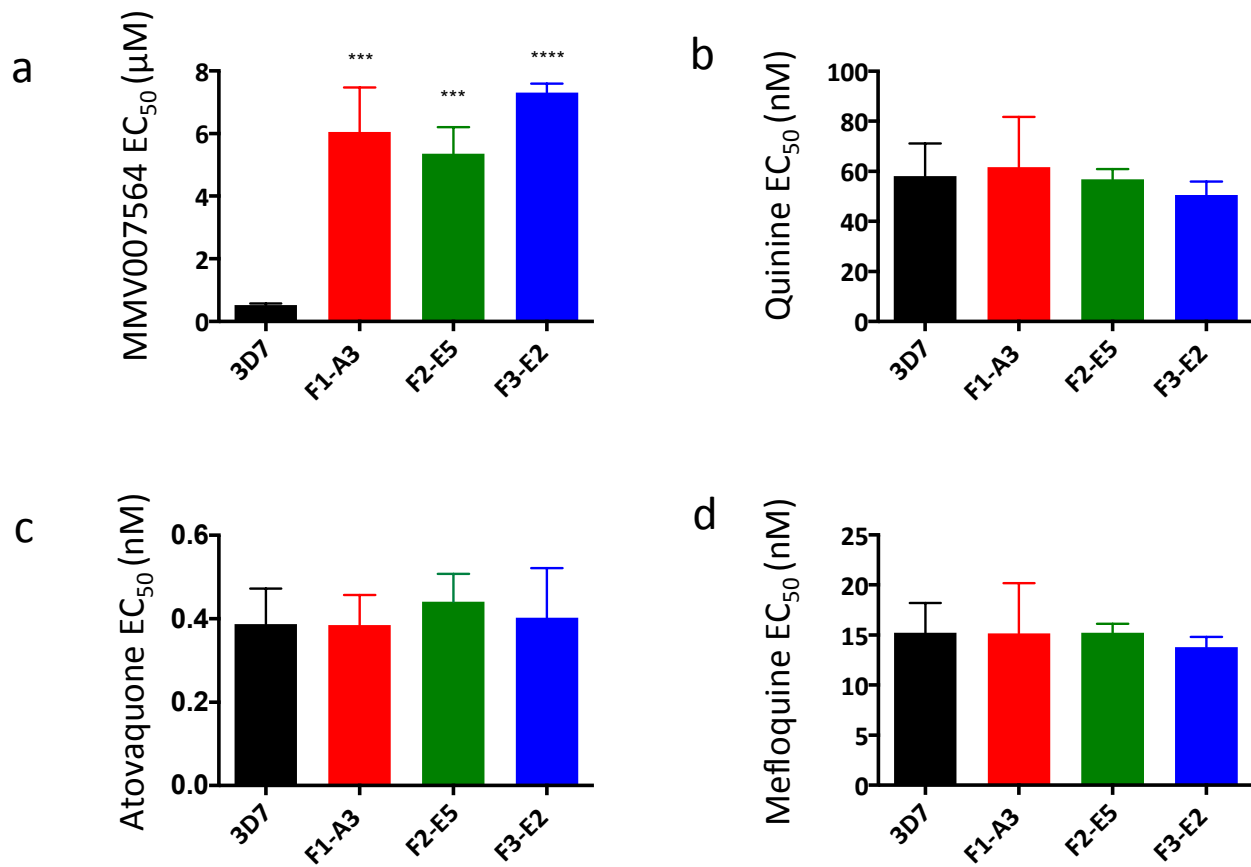

Figure S1. EC<sub>50</sub>s of 3 clones from 3 independent selections showing at least a statistically significant 10-fold increase for MMV007564 (a) compared to the 3D7 parent but not for other antimalarials, quinine (b), atovaquone (c) and mefloquine (d). Bars are means of 3 independent experiments showing standard deviations. Statistical analyses were performed using ordinary one-way ANOVA followed by Dunnett's multiple comparisons test.

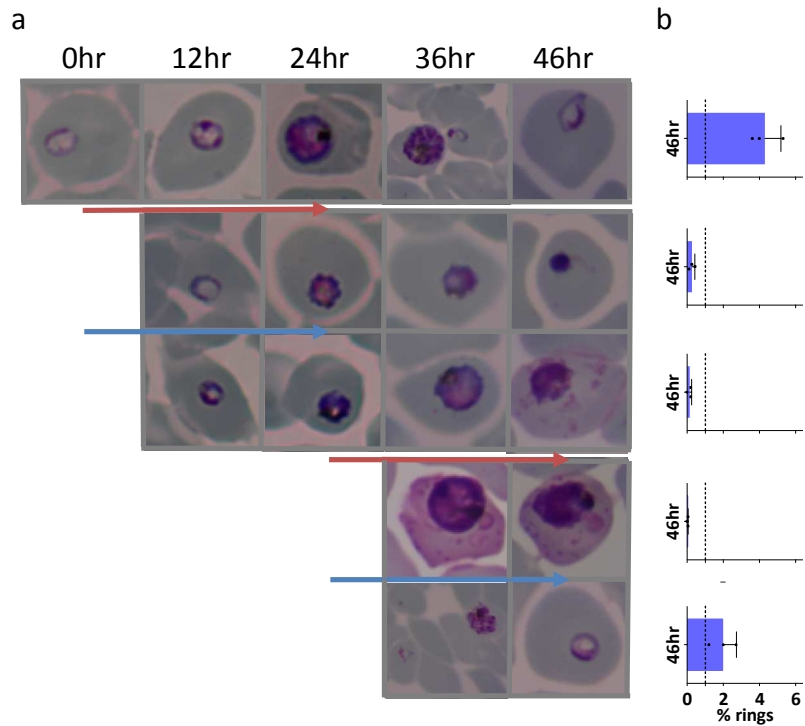

Figure S2. (a) Susceptibility of the different asexual blood stages to  $10 \times EC_{50}$  of MMV007564 (red arrow) and GNF179 (blue arrow) at different time points starting from tightly synchronized, 0-5hr old rings. Top panel is no compound. Arrows indicate the period when each compound was present in the culture (0-24hr and 24-46hr). (b) Bars indicate average ring-stage parasitemia at the 46hr time point and error bars indicate standard deviation for 3 independent experiments. Broken lines at 1% rings indicate starting parasitemia at 0hr.

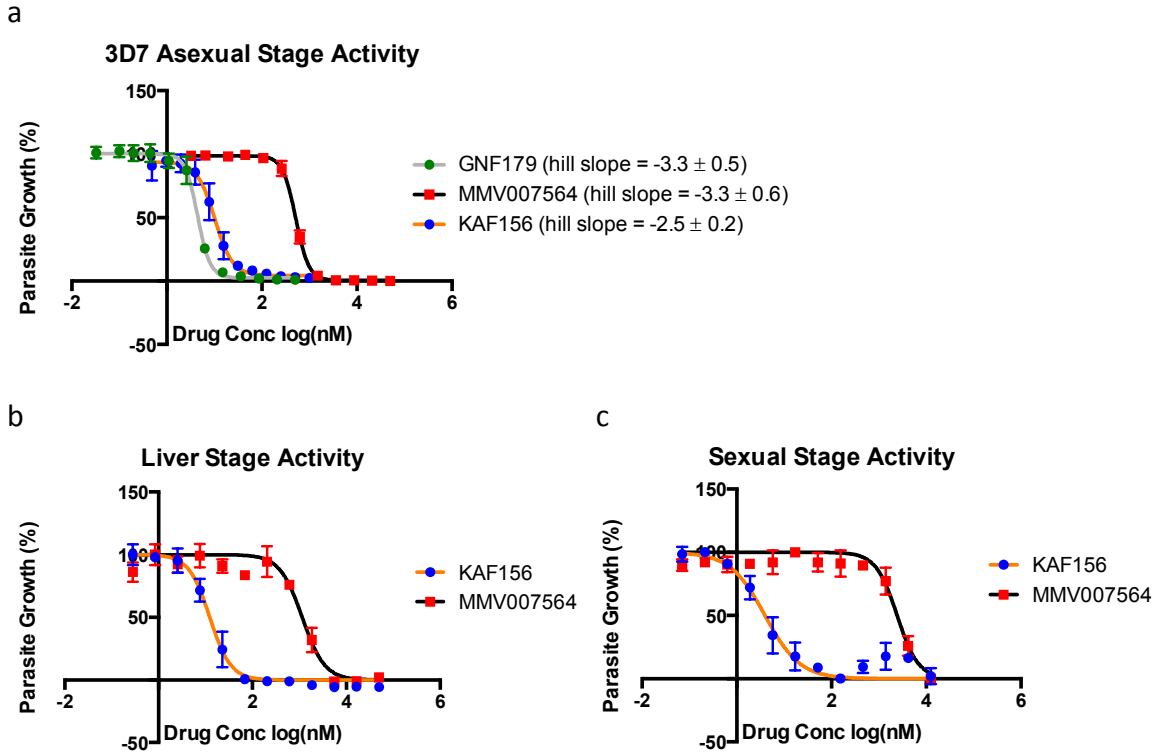

Figure S3. Dose response curves for compounds used for determining the timing of action (GNF179 and MMV007564) and multi-stage activity (KAF156 and MMV007564) at the (a) asexual stage of 3D7, (b) liver stage and (c) sexual stage. Average dose response curves for at least 3 independent experiments are shown except for the gametocyte stage with 2 independent experiments.

Table S1. Whole genome sequencing haplotypcaller sequencing results for Gen16, Gen28, and Gen50 (see attached excel sheet – TableS1\_and\_S3)

Table S2. Applied filters for GATK's HaplotypeCaller

| <i>SNV Filters</i>    |                     | <i>INDEL Filters</i>  |                     |
|-----------------------|---------------------|-----------------------|---------------------|
| <i>Filter Name</i>    | <i>Filter Value</i> | <i>Filter Name</i>    | <i>Filter Value</i> |
| <i>ReadPosRankSum</i> | $> 8.0$             | <i>ReadPosRankSum</i> | $< -20$             |
|                       | $< -8.0$            | <i>QUAL</i>           | $< 500$             |
| <i>QUAL</i>           | $< 500$             | <i>QD</i>             | $< 2$               |
| <i>QD</i>             | $< 2$               | <i>DP</i>             | $< 7$               |
| <i>MQRankSum</i>      | $< -12.5$           |                       |                     |
| <i>DP</i>             | $< 7$               |                       |                     |

Table S3. Summary lists of PfCARL allele mutations identified as conferring benzimidazolyl piperidine and imidazolopiperazine resistance (see attached excel sheet – TableS1\_and\_S3)

Table S4. Inactive benzimidazolyl piperidines with EC<sub>50</sub> values > 3.5μM against the 3D7 parent.

| Compound                                                                                                    | EC <sub>50</sub> (nM) ± SD |                                             |                                         |                                             |
|-------------------------------------------------------------------------------------------------------------|----------------------------|---------------------------------------------|-----------------------------------------|---------------------------------------------|
|                                                                                                             | Parent 3D7                 | MMV007564 <sup>R</sup><br>PfCARL:<br>L1136P | MMV007564 <sup>R</sup><br>PfCARL: L833I | MMV007564 <sup>R</sup><br>PfCARL<br>:L1073Q |
| <i>Benzimidazolyl piperidines with the methyl benzyl of MMV007564 replaced with various chemical groups</i> |                            |                                             |                                         |                                             |
| <b>1</b>                                                                                                    | 11612 ± 1686               | 12375 ± 2279                                | 12011 ± 3727                            | 9367 ± 2483                                 |
| <b>2</b>                                                                                                    | 4466 ± 638                 | 4298 ± 1426                                 | 3877 ± 1103                             | 3016 ± 920                                  |
| <b>3</b>                                                                                                    | 54883 ± 8276               | 61270 ± 11831                               | 50773 ± 7835                            | 49963 ± 4311                                |
| <i>Benzimidazolyl piperidines with the thiophen of MMV007564 replaced with various chemical groups</i>      |                            |                                             |                                         |                                             |
| <b>7</b>                                                                                                    | 11488 ± 1875               | 17323 ± 7007                                | 17240 ± 4820                            | 15420 ± 1051                                |
| <b>10</b>                                                                                                   | 9437 ± 2344                | 9338 ± 2900                                 | 9408 ± 1677                             | 7976 ± 1536                                 |
| <b>11</b>                                                                                                   | 20090 ± 5409               | 21447 ± 6509                                | 22180 ± 4132                            | 17120 ± 3304                                |
| <b>12</b>                                                                                                   | 8522 ± 1741                | 7680 ± 2224                                 | 8490 ± 3015                             | 6510 ± 1826                                 |
| <b>13</b>                                                                                                   | 5714 ± 997                 | 5520 ± 750                                  | 6047 ± 272                              | 5648 ± 147                                  |
| <b>14</b>                                                                                                   | 27917 ± 3530               | 27567 ± 4755                                | 25710 ± 4692                            | 23620 ± 2379                                |
